# Supplementary material
Source: Royal Society of Chemistry journal article supplement (doi:10.1039/d6mh00014b)
Supplement: d6mh00014b1.pdf [file d6mh00014b1.pdf]

## Supplementary Information for

# Piezoelectric [trimethylchloromethyl ammonium][CdCl<sub>3</sub>] microrods/PVC composites for high-fidelity ultrasound detection in the mid-frequency range

Guan-Zhi Wang, Yong-Ji Gong, Chen Zhao, Rui Wang, Xu-Kai Niu, Xue-Qian Wei, Tian-Yi Yang, Hai-Run Yang, Zhi-Gang Li\*, Wei Li, Xian-He Bu

School of Materials Science and Engineering & State Key Laboratory of Elemento-Organic Chemistry, Nankai University, Tianjin 300350, China

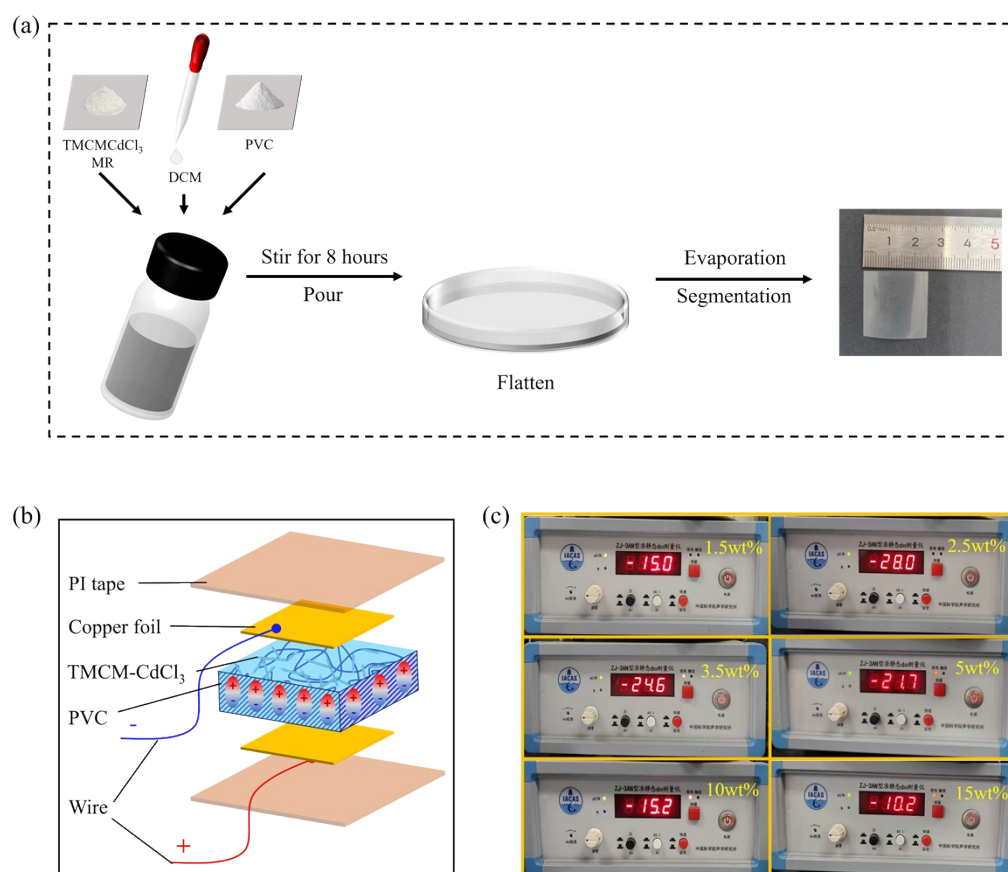

**Fig. S1** (a) Schematic illustration of the preparation of TMMCdCl<sub>3</sub> MRs/PVC composite film. (b) Schematic illustration of TMMCdCl<sub>3</sub> MRs/PVC composite film device. (c) Original  $d_{33}$  figures of composite film devices with different TMMCdCl<sub>3</sub> MRs concentration.

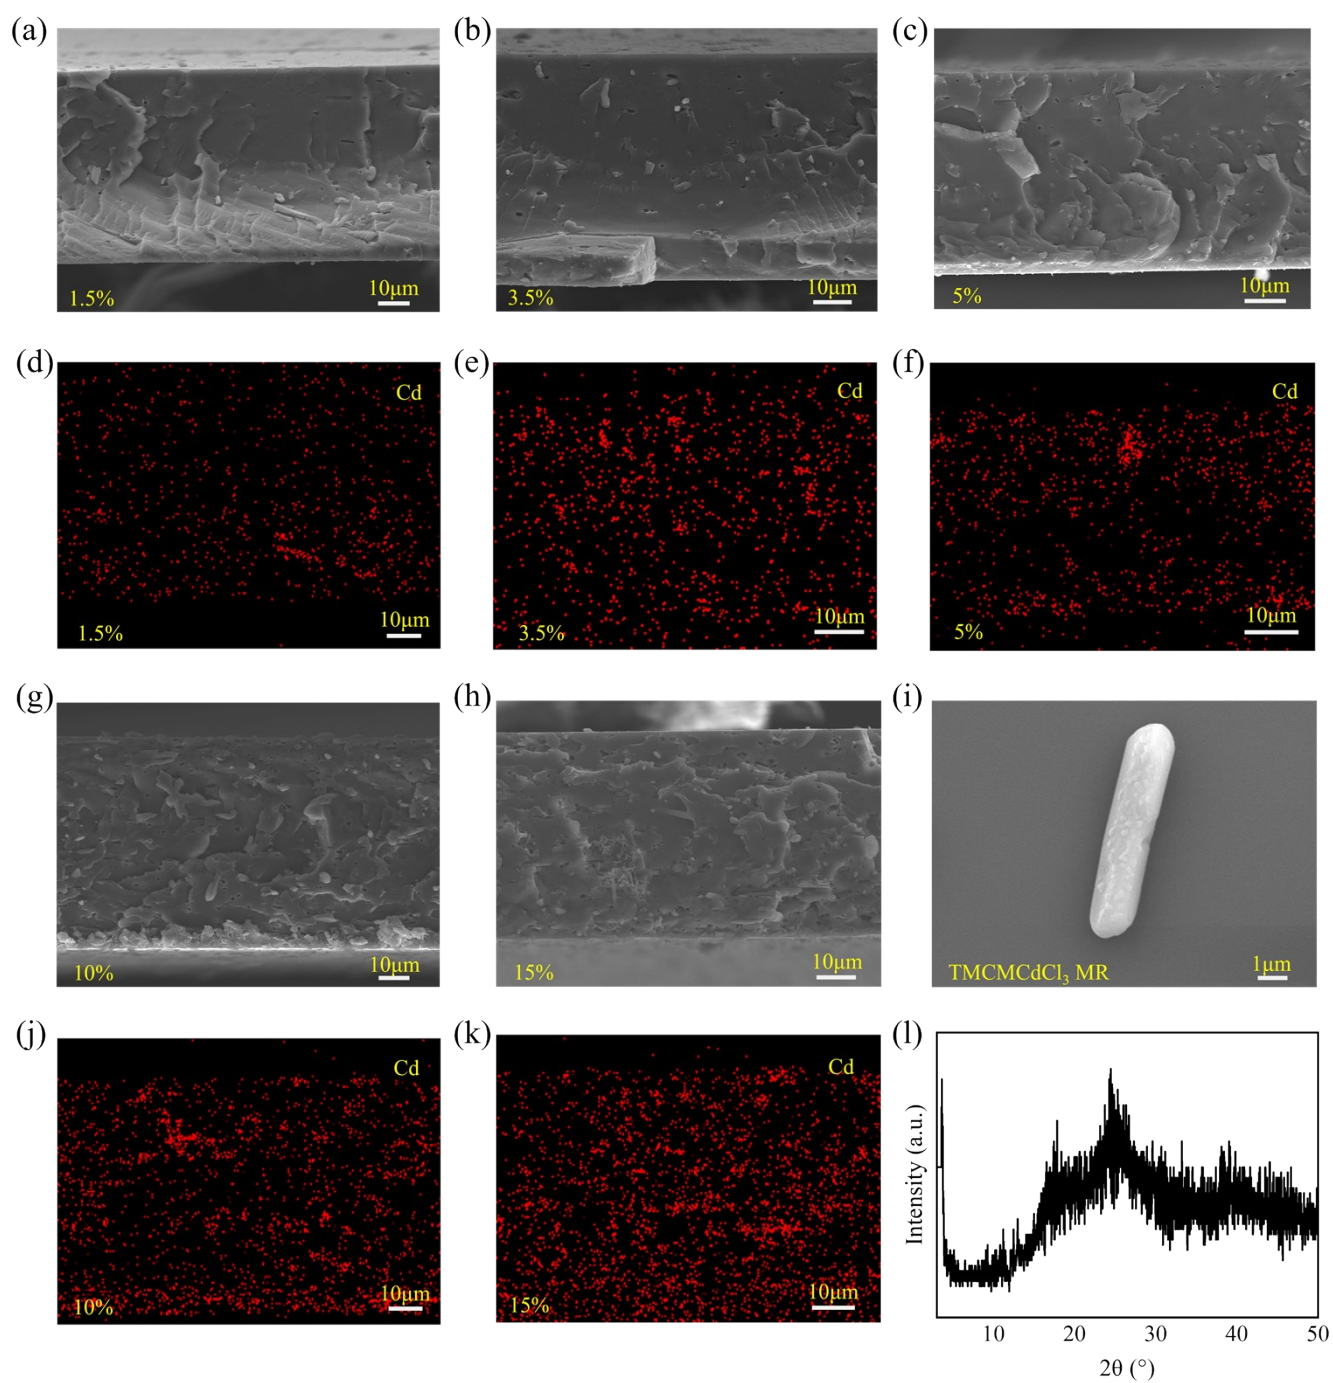

**Fig. S2** SEM images of TCMC-CdCl<sub>3</sub> MRs/PVC composite films with different loadings: (a) 1.5 wt.%, (b) 3.5 wt.%, (c) 5 wt.%, (g) 10 wt.%, and (h) 15 wt.%. Corresponding elemental mapping images of (d) 1.5 wt.%, (e) 3.5 wt.%, (f) 5 wt.%, (j) 10 wt.%, and (k) 15 wt.% composite films. (i) SEM image of a single TCMC-CdCl<sub>3</sub> MR. (l) XRD pattern of a pure PVC film.

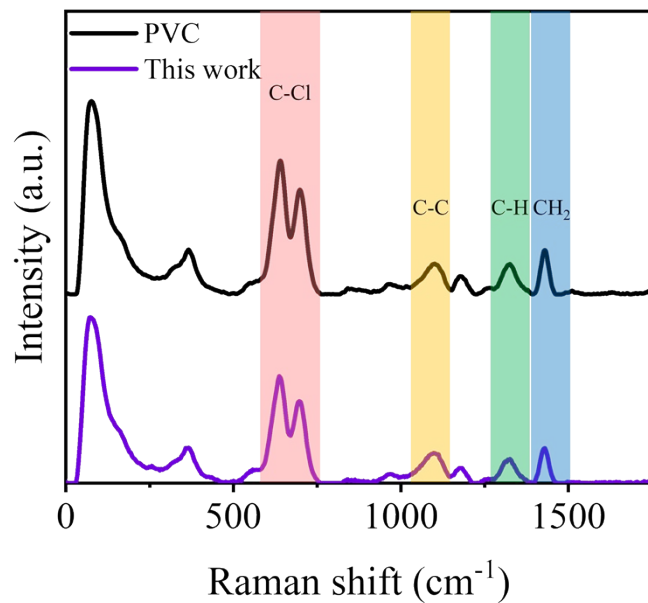

**Fig. S3** Raman spectra of pure PVC film and  $\alpha$ -film focusing in the range of 0-1750  $\text{cm}^{-1}$ .

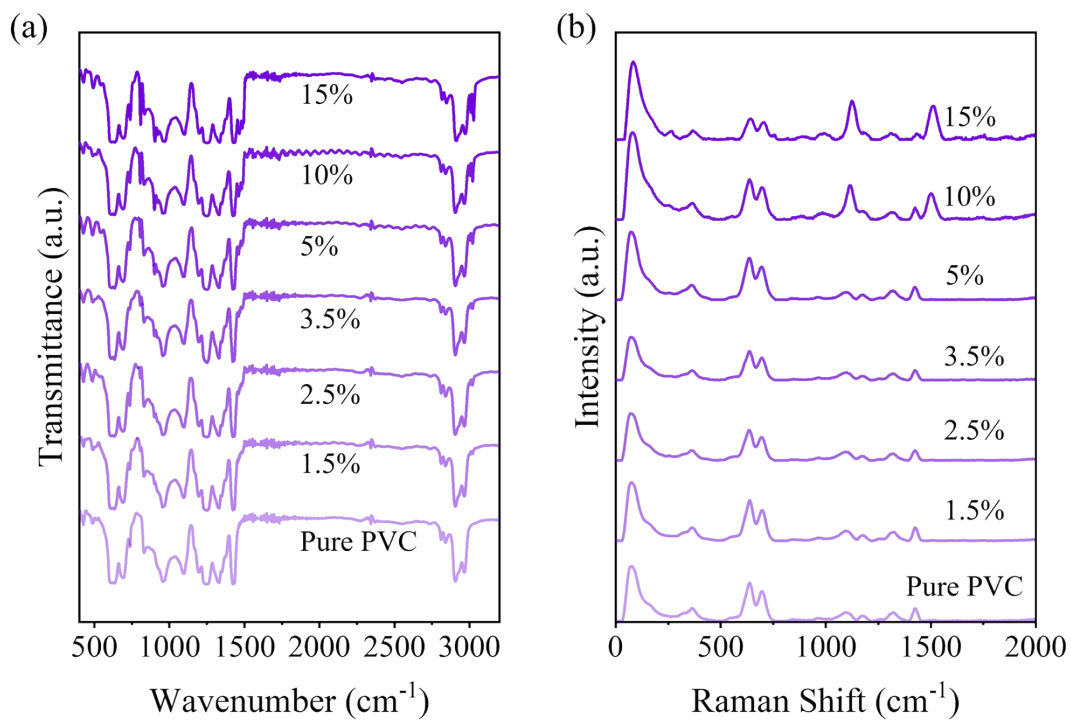

**Fig. S4** Infrared (a) and Raman spectra (b) of pure PVC film and  $\alpha$ -film in the range of 0-1750  $\text{cm}^{-1}$



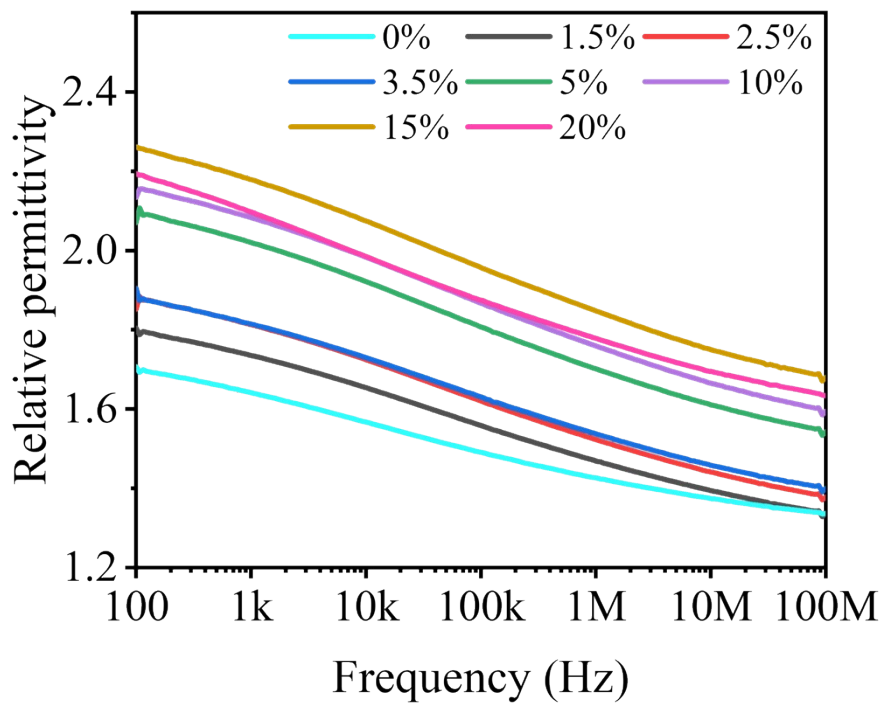

**Fig. S5** The  $\epsilon_r$  of composite films with different concentrations of TMCM-CdCl<sub>3</sub> MRs.

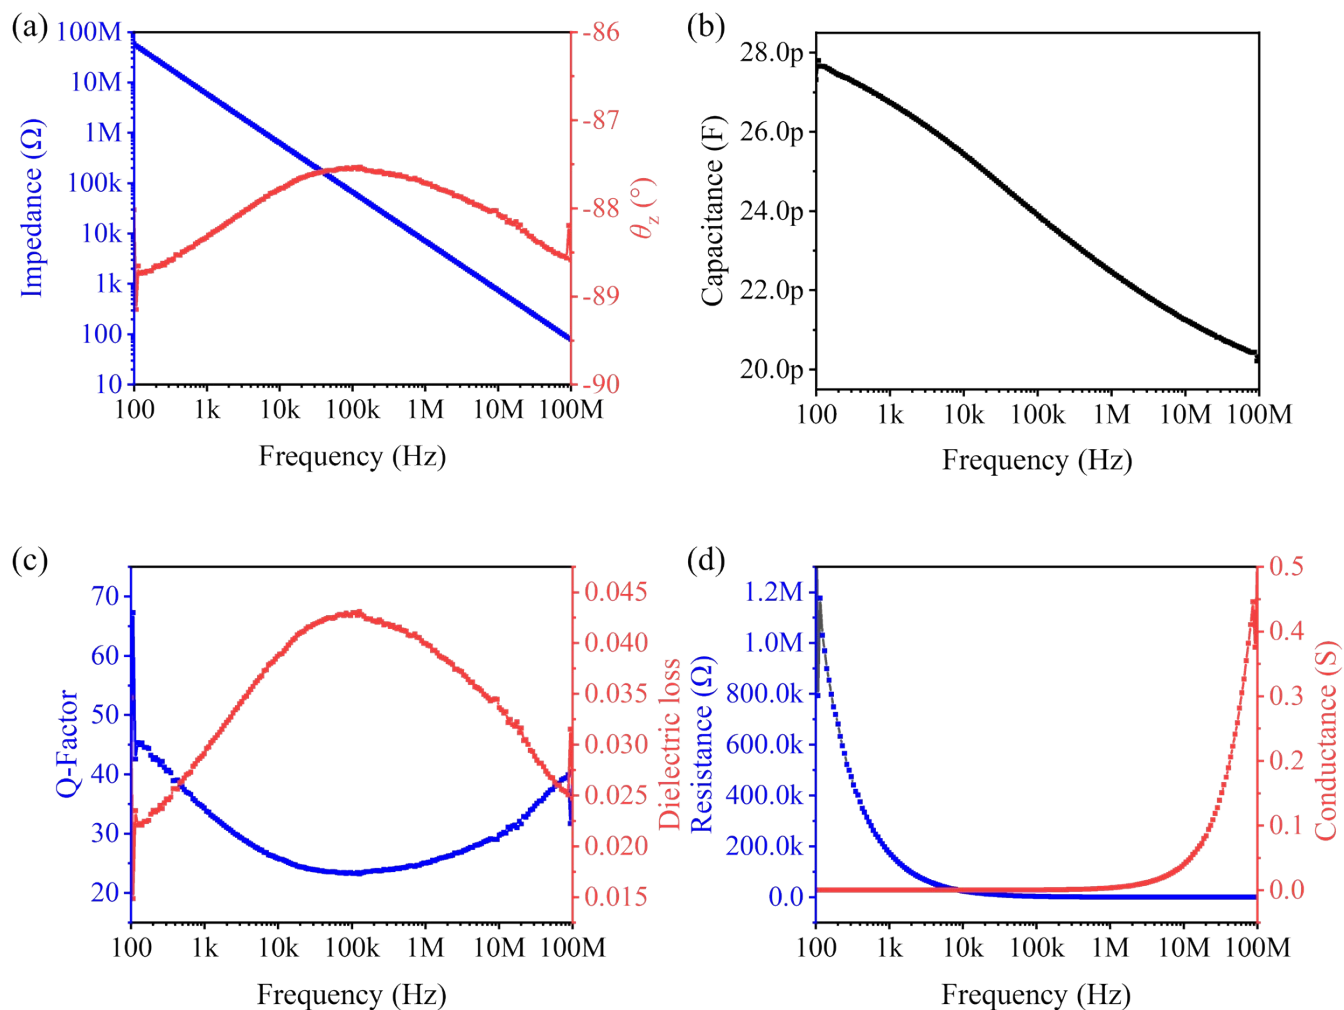

**Fig. S6** Frequency-dependent electrical characteristics of the optimal 2.5 wt.% TMCM-CdCl<sub>3</sub> microrods/PVC composite film device, including (a) impedance magnitude and phase angle, (b) capacitance, (c) quality factor ( $Q$ ) and dielectric loss ( $D$ , or  $\tan \delta$ ), and (d) resistance and conductance.

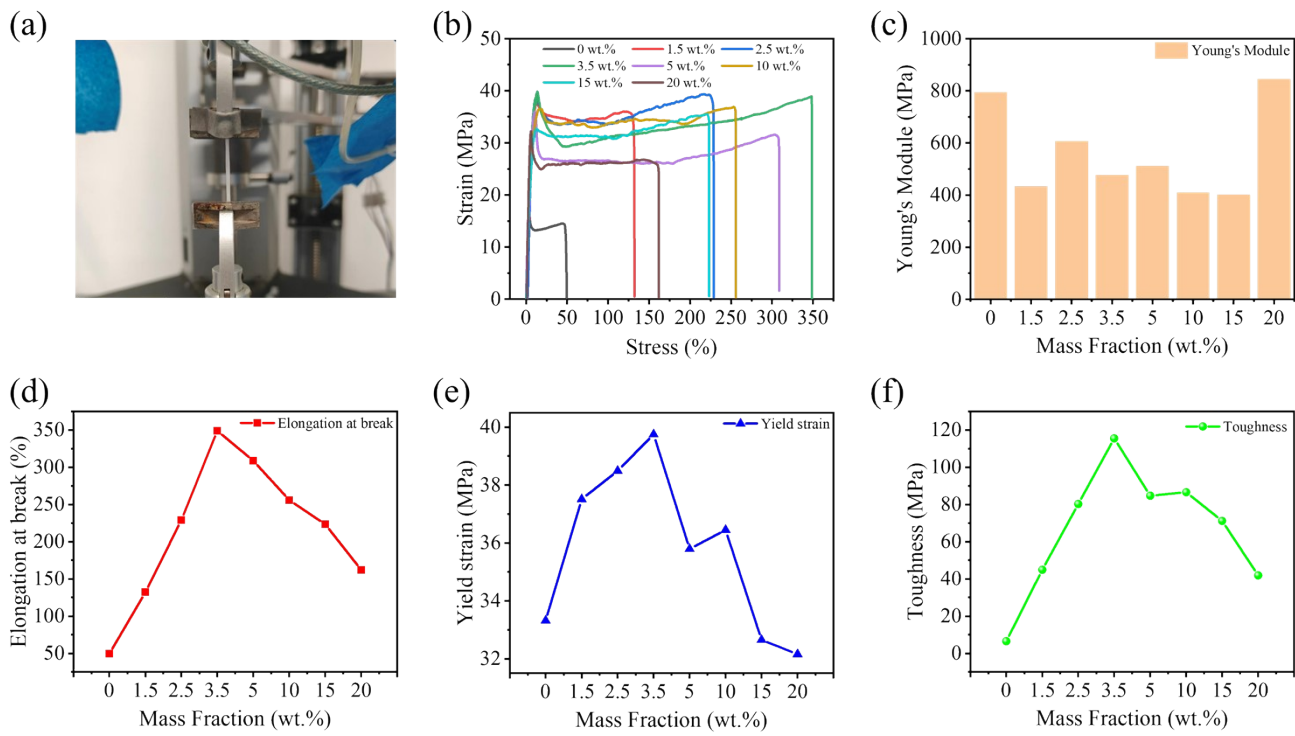

**Fig. S7** Tensile properties of pure PVC and composite films with different mass fractions. (a) Optical photographs during tensile testing; (b) stress–strain curves; (c) Young’s modulus; (d) elongation at break; (e) yield strain; (f) toughness of pure PVC and composite films with different mass fractions.

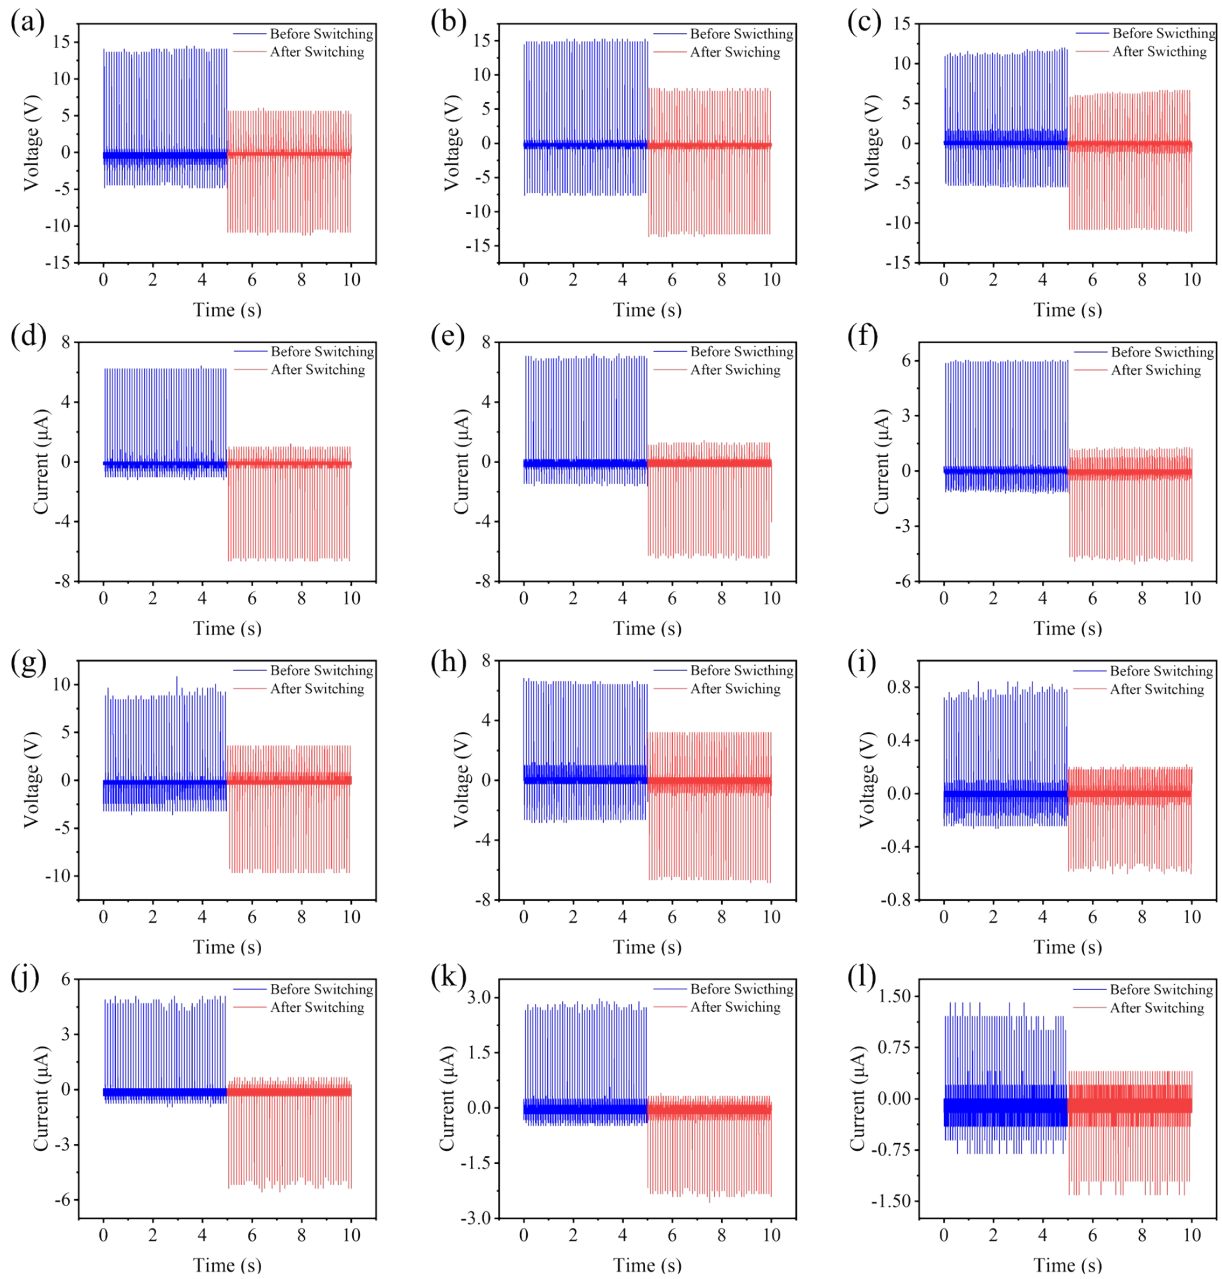

**Fig. S8** The piezoelectric performances of TCMCdCl<sub>3</sub> MRs/PVC composite film devices with different concentration under a constant force of 5 N and a frequency of 10 Hz. The  $V_{oc}$  performance before switching and after switching of PVC-based composite film devices with (a) 1.5wt. %, (b) 3.5wt. %, (c) 5wt.%, (g) 10wt.%, (h) 15wt.% TCMCdCl<sub>3</sub> MRs. The  $I_{sc}$  performance before switching and after switching of PVC-based composite film devices with (d) 1.5wt. %, (e) 3.5wt. %, (f) 5wt.%, (j) 10wt.%, (k) 15wt.% TCMCdCl<sub>3</sub> MRs. The (i)  $V_{oc}$  and (l)  $I_{sc}$  of pure PVC film device before and after switching.

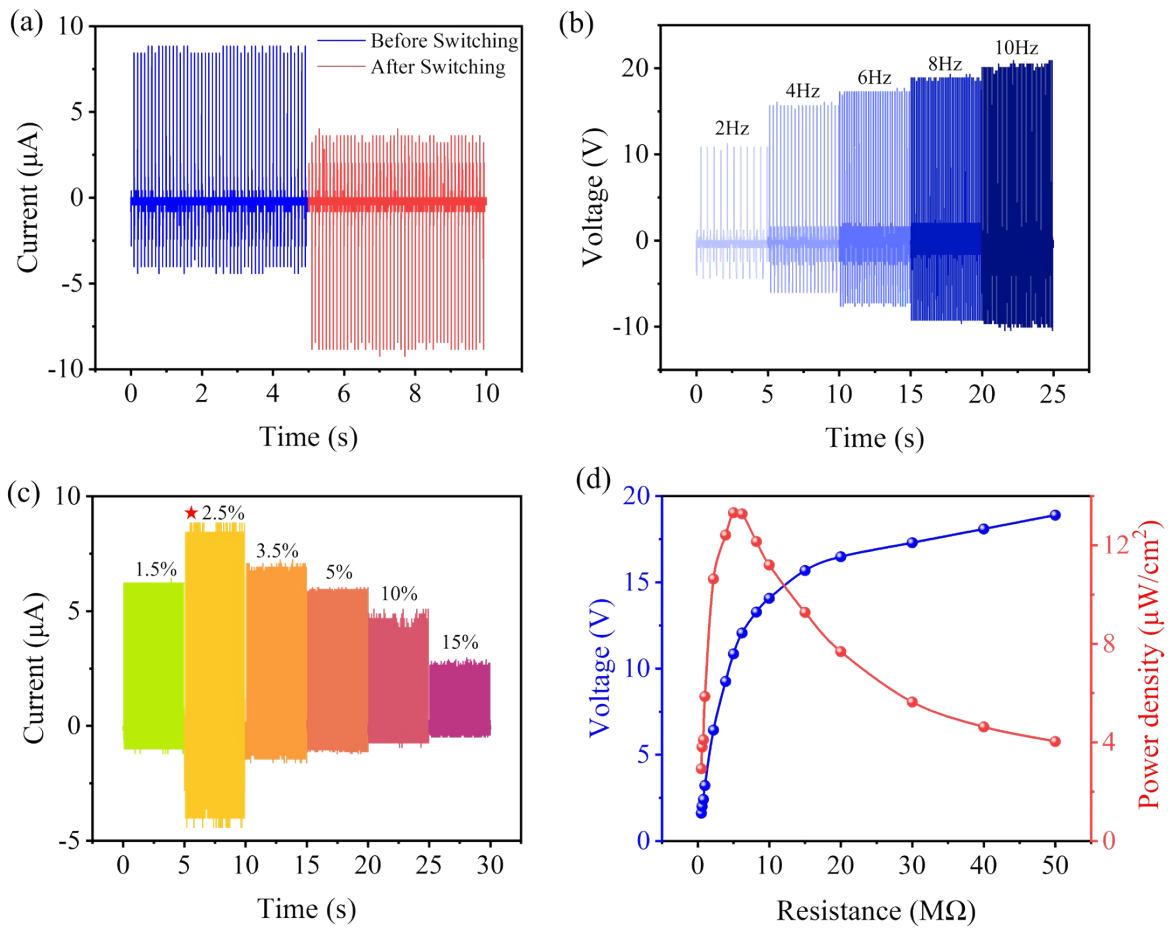

**Fig. S9** The piezoelectric energy harvesting performance of TMCM-CdCl<sub>3</sub> MRs/PVC composite film devices. (a)  $I_{sc}$  performance of the  $\alpha$ -film device. (b)  $V_{oc}$  of the  $\alpha$ -film device at a stimulus force of 5 N and different frequencies. (c)  $I_{sc}$  of composite film devices with different TMCM-CdCl<sub>3</sub> MR concentration. (d)  $V_{oc}$  and power density of the  $\alpha$ -film device under different load resistances.

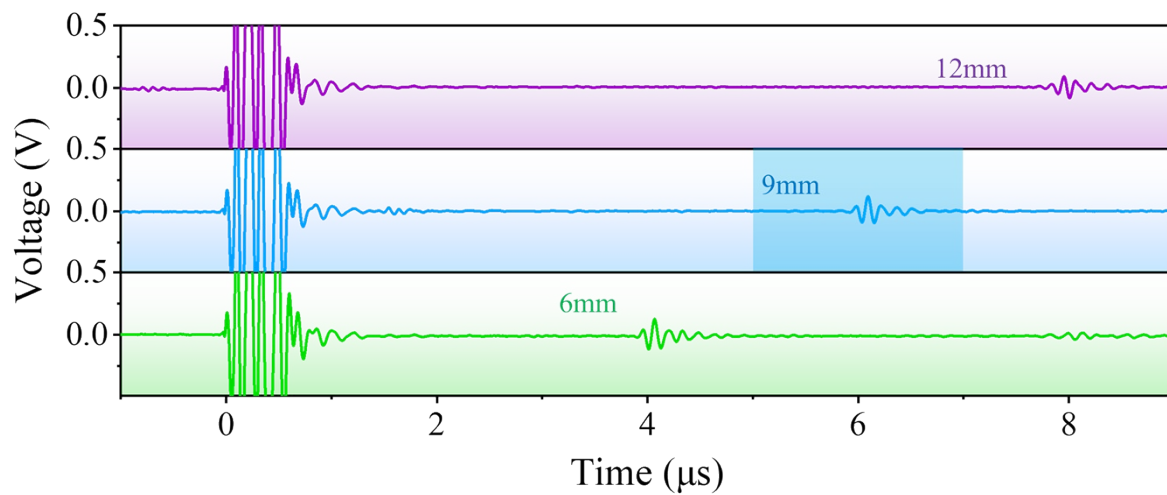

**Fig. S10** Characteristic signals collected from  $\alpha$ -film device under 10 MHz ultrasound excitation, with acoustic source distances of 12, 9, and 6 mm, respectively.

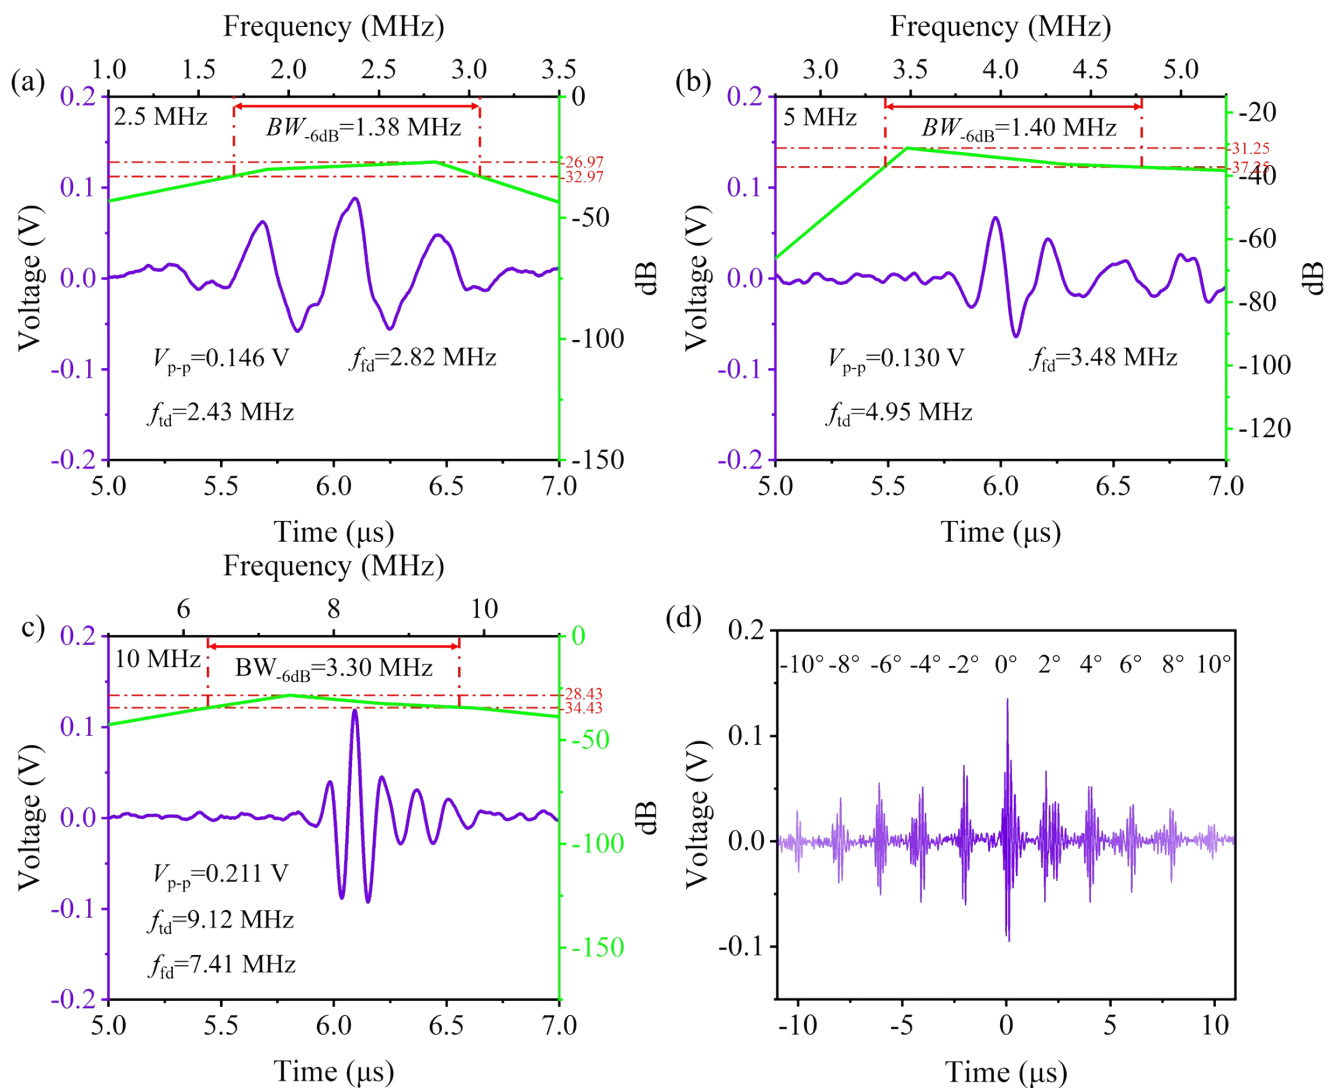

**Fig. S11** Ultrasound detection signals and FFT-based spectral analysis of the  $\alpha$ -film device. Excitation frequencies: (a) 2.5 MHz, (b) 5 MHz, and (c) 10 MHz (corresponding to the highlighted region in Fig. S13). (d) Ultrasound detection responses at different incident angles under 10 MHz excitation.

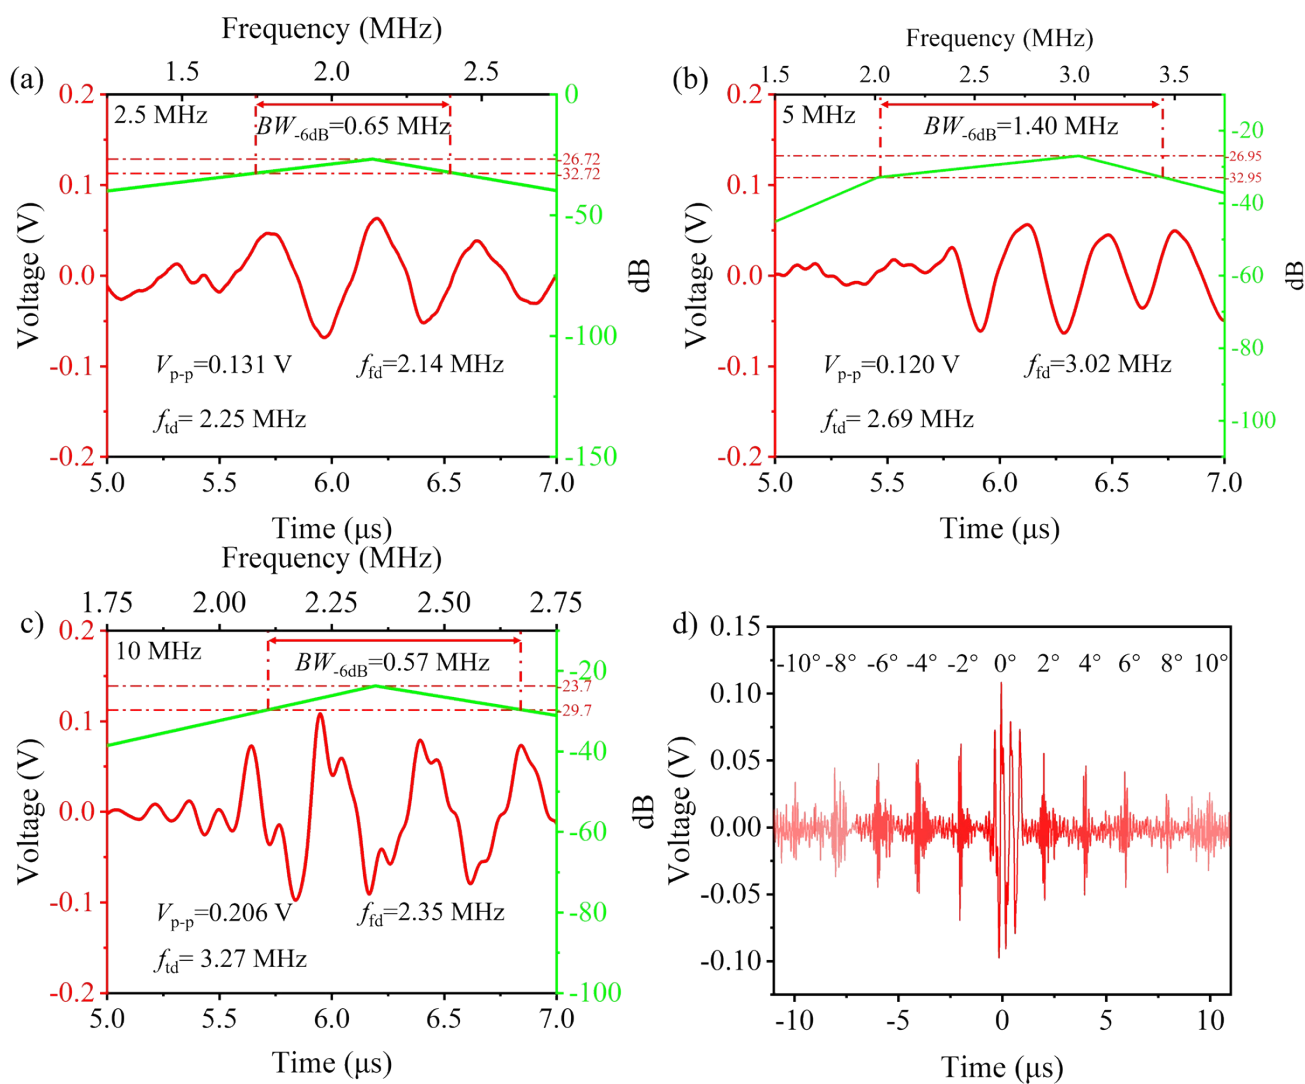

**Fig. S12** Ultrasound detection signals and FFT-based spectral analysis of commercial PZT ceramics. Excitation frequencies: (a) 2.5 MHz, (b) 5 MHz, (c) 10 MHz, (d) Ultrasound detection responses at different incident angles under 10 MHz excitation.

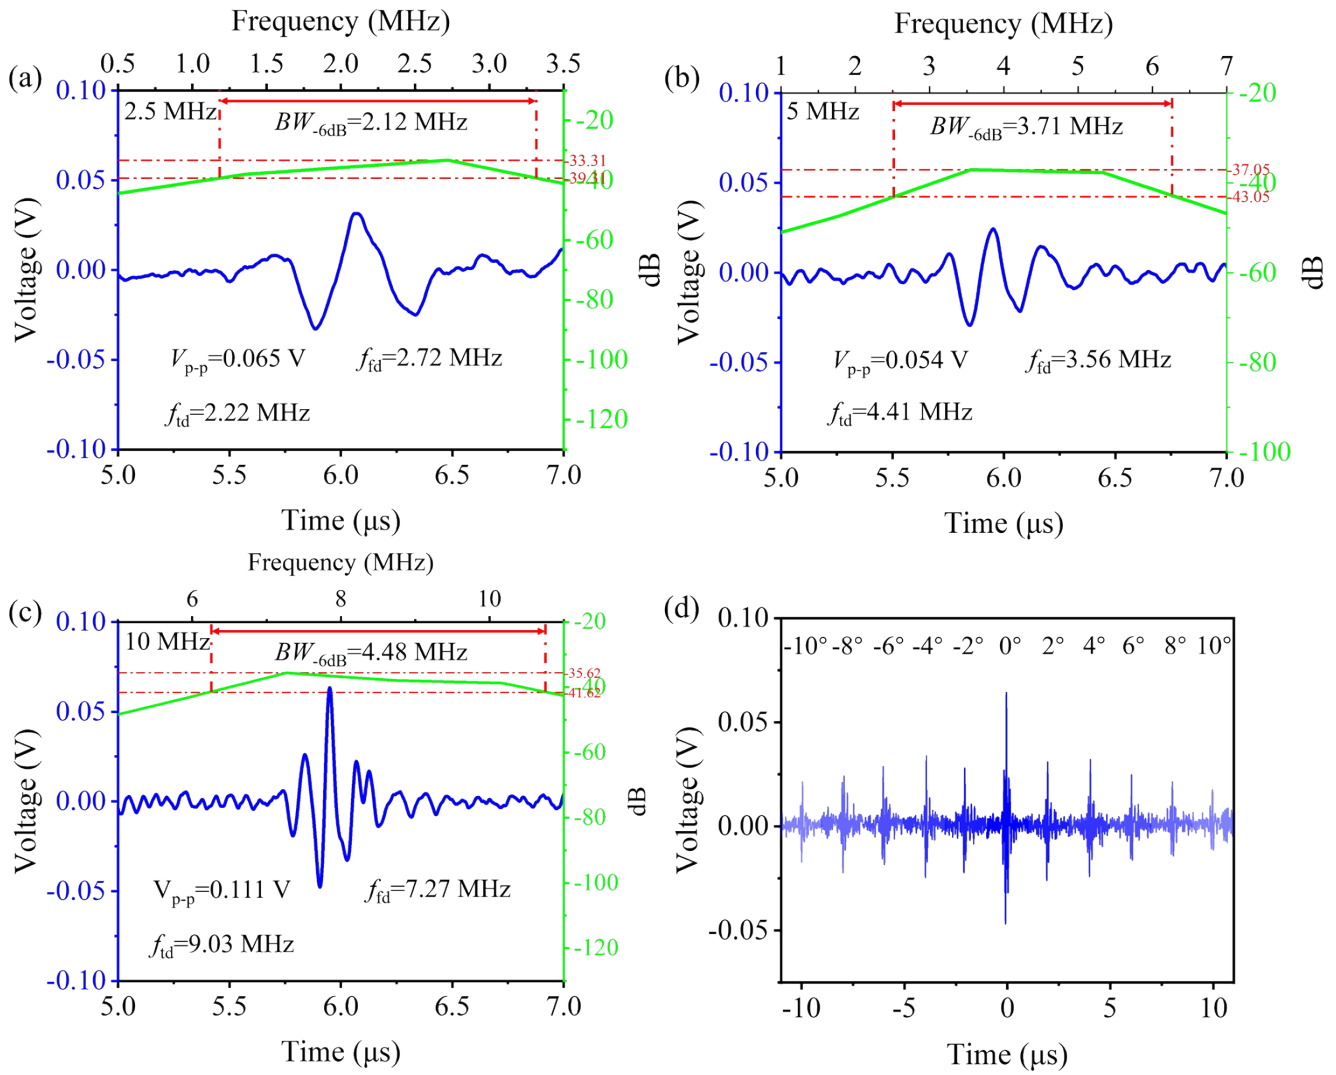

**Fig. S13** Ultrasound detection signals and FFT-based spectral analysis of commercial PVDF. Excitation frequencies: (a) 2.5 MHz, (b) 5 MHz, and (c) 10 MHz. (d) Ultrasound detection responses at different incident angles under 10 MHz excitation.

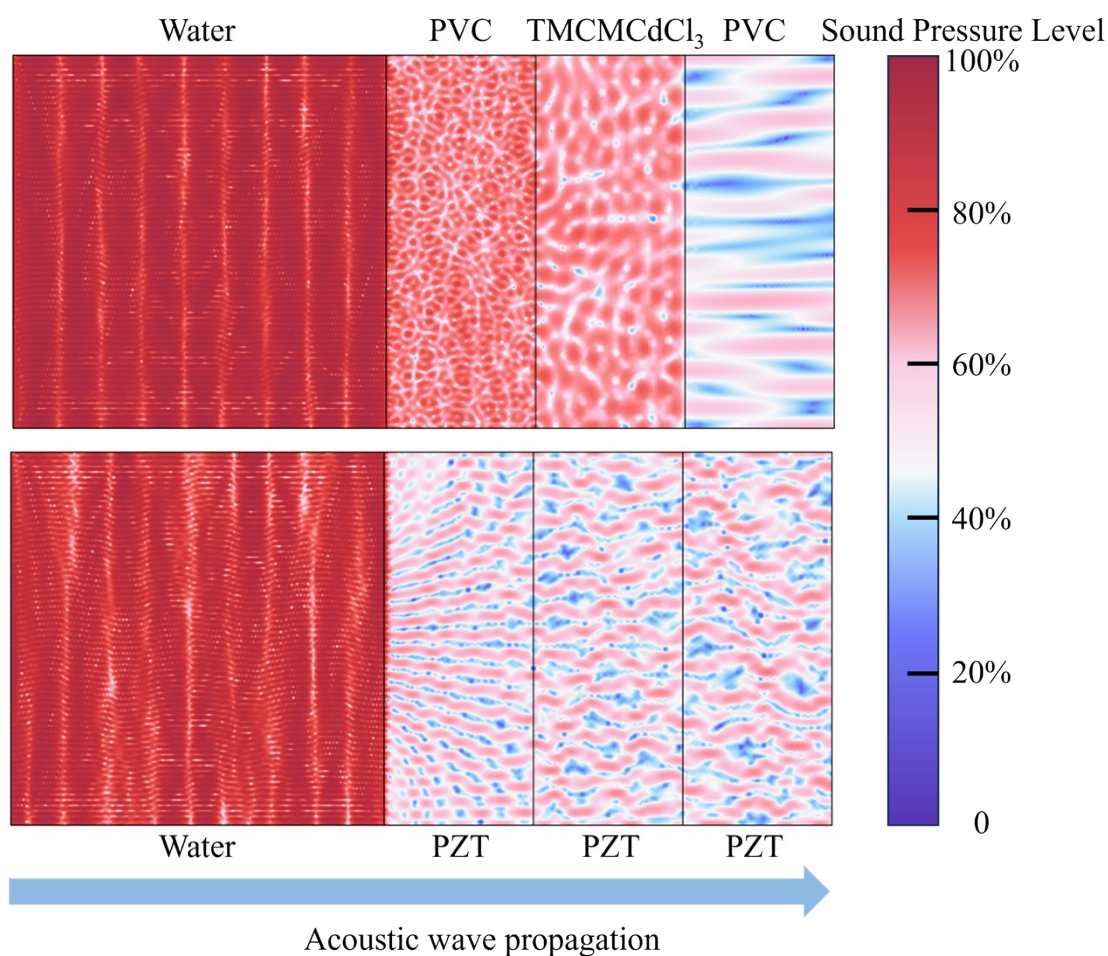

**Fig. S14** Finite element method simulation of ultrasonic wave propagation in water–device systems, comparing the  $\alpha$  composite film device and commercial PZT ceramic.

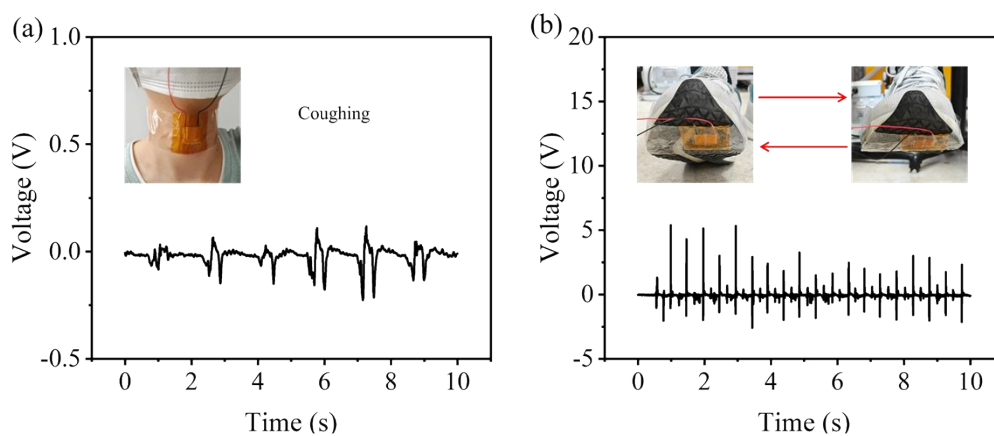

**Fig. S15** Characterization of motion sensing performances. Schematic illustrations and corresponding voltage signals generated by (a) coughing, (b) tiptoe jumping.

**Table S1:** The -6 dB bandwidth of commercial PVDF, PZT and the composite film under 2.5, 5, and 10 MHz excitation frequencies.

|         | PVDF     | PZT      | This work |
|---------|----------|----------|-----------|
| 2.5 MHz | 2.12 MHz | 0.65 MHz | 1.38 MHz  |
| 5 MHz   | 3.71 MHz | 1.40 MHz | 1.40 MHz  |
| 10 MHz  | 4.48 MHz | 0.57 MHz | 3.30 MHz  |
